# Supplementary material for: A Multi-Fluorescent DNA/Graphene Oxide Conjugate Sensor for Signature-Based Protein Discrimination
Source: PubMed Central journal article supplement (PMC5677448; doi:10.3390/s17102194), 2017-09-23
Supplement: sensors-17-02194-s001.pdf [file sensors-17-02194-s001.pdf]

***A multi-fluorescent DNA/graphene oxide conjugate sensor for  
signature-based protein discrimination***

Shunsuke Tomita,<sup>1\*</sup> Sayaka Ishihara,<sup>1</sup> and Ryoji Kurita<sup>1,2\*</sup>

1. Biomedical Research Institute, National Institute of Advanced Industrial Science and Technology, and DAILAB, 1-1-1 Higashi, Tsukuba, Ibaraki 305-8566, Japan.
2. Faculty of Pure and Applied Sciences, University of Tsukuba, 1-1-1 Tennodai, Tsukuba, Ibaraki 305-8573, Japan.

\*Correspondence: s.tomita@aist.go.jp (S.T.); r.kurita@aist.go.jp (R.K.); Tel.: +81-29-861-2634 (S.T.)

**Table S1.** Dataset matrix for the differences between the fluorescence intensity before and after the addition of 15  $\mu\text{g/mL}$  proteins generated from the multi-fluorescent nGO/ssDNA sensor.

| Analyte | Ch1   | Ch2   | Ch3   | Ch4   | Ch5   | Ch6   | Ch7   |
|---------|-------|-------|-------|-------|-------|-------|-------|
| Cat     | 64.40 | 25.38 | 10.34 | 36.91 | 14.01 | 55.06 | 1.25  |
| Cat     | 58.59 | 23.41 | 9.06  | 33.41 | 12.84 | 52.74 | 0.97  |
| Cat     | 64.18 | 22.84 | 8.36  | 39.84 | 14.49 | 54.11 | 0.71  |
| Cat     | 54.53 | 15.17 | 5.56  | 34.40 | 12.20 | 49.28 | -1.91 |
| Cat     | 55.68 | 20.99 | 9.37  | 36.49 | 14.40 | 49.24 | 0.70  |
| Cat     | 50.49 | 17.52 | 6.80  | 33.51 | 13.14 | 48.50 | 1.17  |
| Gal     | 41.56 | 16.84 | 6.37  | 21.18 | 8.62  | 38.48 | 0.44  |
| Gal     | 41.33 | 17.65 | 6.88  | 21.05 | 8.46  | 37.86 | 1.74  |
| Gal     | 41.06 | 13.84 | 5.42  | 23.69 | 9.36  | 37.00 | 0.49  |
| Gal     | 40.31 | 12.13 | 3.90  | 24.57 | 9.09  | 37.36 | -0.92 |
| Gal     | 48.72 | 17.08 | 6.58  | 27.95 | 10.39 | 39.23 | -0.42 |
| Gal     | 46.77 | 15.99 | 6.49  | 27.72 | 10.14 | 39.41 | 0.22  |
| Myo     | 61.96 | 25.37 | 9.73  | 34.53 | 12.36 | 22.35 | -1.15 |
| Myo     | 55.58 | 21.77 | 8.68  | 30.92 | 11.75 | 22.45 | -1.84 |
| Myo     | 60.99 | 20.71 | 7.82  | 37.68 | 13.13 | 29.13 | -2.01 |
| Myo     | 53.29 | 14.85 | 5.22  | 33.61 | 11.71 | 25.39 | -3.97 |
| Myo     | 62.08 | 21.54 | 9.18  | 40.75 | 14.37 | 28.59 | -2.54 |
| Myo     | 57.97 | 19.02 | 8.09  | 38.03 | 13.17 | 27.30 | -2.23 |
| pep     | 43.69 | 16.43 | 4.48  | 15.90 | 4.83  | 38.71 | -1.99 |
| pep     | 42.54 | 16.58 | 5.55  | 15.45 | 4.66  | 38.87 | -0.38 |
| pep     | 34.39 | 2.31  | -1.33 | 14.58 | 3.76  | 32.84 | -4.20 |
| pep     | 34.94 | 4.30  | -0.57 | 15.18 | 3.58  | 34.10 | -4.47 |
| pep     | 37.82 | 7.06  | 0.92  | 16.72 | 5.09  | 35.69 | -3.13 |
| pep     | 35.56 | 6.71  | 0.19  | 16.48 | 4.49  | 36.02 | -2.90 |
| Lys     | 36.90 | 13.69 | 4.54  | 18.22 | 7.07  | 33.60 | 0.04  |
| Lys     | 34.53 | 12.60 | 4.18  | 16.75 | 6.66  | 31.82 | -0.35 |
| Lys     | 32.61 | 8.11  | 1.84  | 17.46 | 6.56  | 30.41 | -1.96 |
| Lys     | 31.31 | 4.42  | 0.06  | 17.59 | 6.29  | 28.50 | -3.13 |
| Lys     | 33.07 | 9.29  | 3.36  | 19.16 | 6.86  | 29.70 | -1.31 |
| Lys     | 33.98 | 9.06  | 2.52  | 19.44 | 7.06  | 30.96 | -1.37 |

|     |       |        |       |       |       |       |       |
|-----|-------|--------|-------|-------|-------|-------|-------|
| Chy | 22.04 | 8.17   | 1.74  | 8.65  | 2.31  | 23.13 | -0.49 |
| Chy | 20.12 | 7.71   | 2.79  | 8.22  | 2.62  | 23.32 | -0.61 |
| Chy | 22.47 | 3.84   | 0.25  | 10.18 | 2.70  | 22.91 | -1.64 |
| Chy | 19.19 | 1.80   | -0.96 | 9.36  | 2.45  | 22.20 | -1.44 |
| Chy | 25.97 | 7.68   | 2.16  | 11.62 | 3.18  | 24.66 | -1.38 |
| Chy | 25.76 | 7.35   | 1.72  | 11.06 | 3.43  | 24.97 | -0.04 |
| Cyt | 64.38 | 27.31  | 10.70 | 39.34 | 14.65 | 60.04 | 1.63  |
| Cyt | 60.75 | 23.59  | 9.03  | 37.88 | 13.99 | 57.97 | 1.31  |
| Cyt | 56.38 | 16.13  | 5.63  | 39.53 | 14.33 | 54.98 | -2.01 |
| Cyt | 53.67 | 16.96  | 6.13  | 37.53 | 14.07 | 53.85 | -0.54 |
| Cyt | 57.32 | 18.79  | 7.26  | 42.12 | 15.21 | 57.93 | 0.28  |
| Cyt | 56.18 | 17.98  | 6.89  | 41.28 | 14.85 | 57.58 | 0.04  |
| Tra | 11.01 | 0.24   | -0.75 | 6.38  | 1.41  | 17.54 | -2.79 |
| Tra | 8.80  | 0.33   | 0.03  | 5.76  | 1.31  | 17.15 | -2.32 |
| Tra | 5.45  | -7.61  | -4.33 | 5.80  | 0.66  | 14.14 | -4.97 |
| Tra | 4.96  | -9.12  | -5.85 | 5.87  | 0.86  | 13.64 | -4.59 |
| Tra | 8.81  | -5.43  | -2.88 | 6.86  | 1.67  | 15.93 | -4.50 |
| Tra | 8.70  | -2.95  | -1.72 | 6.65  | 1.18  | 15.47 | -4.44 |
| BSA | 3.33  | -4.60  | -2.28 | 3.49  | 0.16  | 8.82  | -3.80 |
| BSA | 0.03  | -4.61  | -1.72 | 3.28  | 0.08  | 6.92  | -4.54 |
| BSA | -1.39 | -11.78 | -6.39 | 3.55  | -0.60 | 6.34  | -3.58 |
| BSA | -6.02 | -14.09 | -7.34 | 2.67  | -0.98 | 3.83  | -7.28 |
| BSA | 0.82  | -9.86  | -4.84 | 3.47  | -0.53 | 7.16  | -5.18 |
| BSA | -2.53 | -9.74  | -5.31 | 3.08  | -0.51 | 4.97  | -5.35 |
| IgG | 1.14  | -3.11  | -1.64 | 3.95  | 0.45  | 5.90  | -2.64 |
| IgG | -4.93 | -6.16  | -2.34 | 2.26  | 0.45  | 3.01  | -2.77 |
| IgG | -2.88 | -9.19  | -4.82 | 3.61  | -0.07 | 3.35  | -5.12 |
| IgG | -4.93 | -13.41 | -6.51 | 3.28  | -0.74 | 2.29  | -6.59 |
| IgG | -1.29 | -7.72  | -3.75 | 3.86  | 0.22  | 3.49  | -4.85 |
| IgG | -1.39 | -7.75  | -3.42 | 3.60  | 0.18  | 2.97  | -4.52 |

**Table S2.** Blind test of 60 samples using the multi-fluorescent nGO/ssDNA sensor.

| Identification | Ch1   | Ch2    | Ch3   | Ch4   | Ch5   | Ch6   | Ch7   | Seven channels |           | Three channels<br>(Ch1, Ch4, and Ch6) |           |
|----------------|-------|--------|-------|-------|-------|-------|-------|----------------|-----------|---------------------------------------|-----------|
|                |       |        |       |       |       |       |       | Verification   | Accuracy  | Verification                          | Accuracy  |
|                |       |        |       |       |       |       |       | Cat            | 62.75     | 22.78                                 | 9.75      |
| Cat            | 49.32 | 16.81  | 7.34  | 36.98 | 14.43 | 45.44 | 0.46  | Cat            | YES       | Cat                                   | YES       |
| Cat            | 64.37 | 24.04  | 9.89  | 45.40 | 17.52 | 53.76 | 0.68  | Cat            | YES       | Cat                                   | YES       |
| Cat            | 59.00 | 20.34  | 7.28  | 43.28 | 16.07 | 54.11 | 1.22  | <b>Cyt</b>     | <b>NO</b> | <b>Cyt</b>                            | <b>NO</b> |
| Cat            | 67.81 | 26.70  | 10.56 | 44.11 | 16.67 | 56.21 | 2.23  | Cat            | YES       | Cat                                   | YES       |
| Cat            | 58.28 | 19.68  | 8.10  | 38.68 | 15.01 | 54.61 | 0.51  | Cat            | YES       | <b>Cyt</b>                            | <b>NO</b> |
| Gal            | 41.19 | 14.84  | 6.47  | 30.53 | 12.26 | 33.51 | -0.22 | Gal            | YES       | Gal                                   | YES       |
| Gal            | 32.87 | 9.98   | 4.40  | 24.93 | 10.49 | 31.61 | -1.31 | Gal            | YES       | Gal                                   | YES       |
| Gal            | 36.38 | 13.22  | 4.99  | 25.21 | 9.77  | 33.39 | -0.46 | Gal            | YES       | Gal                                   | YES       |
| Gal            | 33.65 | 11.04  | 4.60  | 24.37 | 9.87  | 32.17 | 0.55  | Gal            | YES       | Gal                                   | YES       |
| Gal            | 41.42 | 16.26  | 6.80  | 30.89 | 12.20 | 37.44 | 0.61  | Gal            | YES       | Gal                                   | YES       |
| Gal            | 37.07 | 13.83  | 6.33  | 28.42 | 11.92 | 36.82 | 0.59  | Gal            | YES       | Gal                                   | YES       |
| Myo            | 64.04 | 24.80  | 10.90 | 43.51 | 16.07 | 27.48 | -1.62 | Myo            | YES       | Myo                                   | YES       |
| Myo            | 53.57 | 16.81  | 7.68  | 41.43 | 14.69 | -2.37 | -5.89 | Myo            | YES       | Myo                                   | YES       |
| Myo            | 58.28 | 21.23  | 8.97  | 41.63 | 15.31 | 25.55 | -1.45 | Myo            | YES       | Myo                                   | YES       |
| Myo            | 58.96 | 21.35  | 10.33 | 44.02 | 15.90 | -0.71 | -4.49 | Myo            | YES       | Myo                                   | YES       |
| Myo            | 64.88 | 25.55  | 11.23 | 45.03 | 16.87 | 24.10 | -1.09 | Myo            | YES       | Myo                                   | YES       |
| Myo            | 58.40 | 21.59  | 8.61  | 40.24 | 15.04 | 21.44 | -2.53 | Myo            | YES       | Myo                                   | YES       |
| pep            | 34.61 | 3.18   | -1.24 | 16.29 | 4.29  | 29.67 | -4.11 | pep            | YES       | <b>Lys</b>                            | <b>NO</b> |
| pep            | 33.96 | 4.68   | -1.12 | 15.80 | 4.06  | 30.61 | -4.96 | pep            | YES       | <b>Lys</b>                            | <b>NO</b> |
| pep            | 37.34 | 7.57   | 0.94  | 18.41 | 6.31  | 36.05 | -0.53 | <b>Lys</b>     | <b>NO</b> | pep                                   | YES       |
| pep            | 36.40 | 8.50   | 1.25  | 18.04 | 5.75  | 36.53 | -1.11 | pep            | YES       | pep                                   | YES       |
| pep            | 39.28 | 9.04   | 1.54  | 15.94 | 5.06  | 35.75 | -3.33 | pep            | YES       | pep                                   | YES       |
| pep            | 38.69 | 12.30  | 3.18  | 15.83 | 5.35  | 37.13 | -2.21 | pep            | YES       | pep                                   | YES       |
| Lys            | 28.10 | 6.27   | 1.97  | 19.69 | 7.47  | 25.93 | -2.42 | Lys            | YES       | Lys                                   | YES       |
| Lys            | 27.68 | 2.59   | 0.67  | 19.94 | 6.53  | 24.07 | -3.78 | Lys            | YES       | Lys                                   | YES       |
| Lys            | 31.71 | 10.26  | 3.61  | 19.28 | 7.62  | 30.75 | -0.52 | Lys            | YES       | Lys                                   | YES       |
| Lys            | 29.84 | 7.70   | 2.38  | 18.99 | 7.49  | 29.26 | -1.45 | Lys            | YES       | Lys                                   | YES       |
| Lys            | 33.18 | 10.80  | 3.18  | 20.26 | 8.24  | 31.05 | -0.25 | Lys            | YES       | Lys                                   | YES       |
| Lys            | 33.04 | 10.24  | 3.13  | 19.76 | 7.68  | 31.50 | -0.66 | Lys            | YES       | Lys                                   | YES       |
| Chy            | 17.69 | 1.40   | 0.16  | 10.20 | 3.21  | 17.56 | -2.03 | Chy            | YES       | <b>Tra</b>                            | <b>NO</b> |
| Chy            | 18.46 | 2.54   | 0.21  | 11.76 | 3.60  | 18.63 | -1.62 | Chy            | YES       | Chy                                   | YES       |
| Chy            | 18.56 | 4.11   | 1.14  | 10.84 | 3.70  | 20.89 | -1.09 | Chy            | YES       | Chy                                   | YES       |
| Chy            | 18.51 | 5.84   | 1.69  | 10.95 | 3.13  | 20.58 | -0.43 | Chy            | YES       | Chy                                   | YES       |
| Chy            | 21.30 | 5.20   | 1.99  | 12.24 | 4.05  | 23.48 | -1.12 | Chy            | YES       | Chy                                   | YES       |
| Chy            | 18.91 | 6.04   | 1.68  | 11.46 | 4.11  | 23.59 | -0.21 | Chy            | YES       | Chy                                   | YES       |
| Cyt            | 47.00 | 11.44  | 3.95  | 31.27 | 11.03 | 41.74 | -2.93 | <b>Gal</b>     | <b>NO</b> | <b>Gal</b>                            | <b>NO</b> |
| Cyt            | 57.22 | 20.98  | 8.65  | 44.08 | 16.82 | 56.85 | 2.01  | Cyt            | YES       | Cyt                                   | YES       |
| Cyt            | 55.91 | 20.85  | 8.52  | 43.86 | 16.55 | 56.08 | 1.68  | Cyt            | YES       | Cyt                                   | YES       |
| Cyt            | 58.18 | 22.46  | 9.54  | 40.63 | 15.37 | 56.84 | 0.88  | Cyt            | YES       | Cyt                                   | YES       |
| Cyt            | 51.57 | 15.57  | 5.60  | 34.31 | 12.19 | 42.99 | -1.40 | <b>Gal</b>     | <b>NO</b> | <b>Cat</b>                            | <b>NO</b> |
| Cyt            | 56.35 | 18.95  | 7.74  | 39.62 | 15.01 | 56.17 | 0.44  | Cyt            | YES       | Cyt                                   | YES       |
| Tra            | 5.25  | -6.35  | -3.90 | 6.50  | 1.33  | 12.39 | -5.43 | Tra            | YES       | Tra                                   | YES       |
| Tra            | 5.82  | -6.46  | -3.75 | 7.07  | 1.31  | 12.26 | -4.57 | Tra            | YES       | Tra                                   | YES       |
| Tra            | 8.90  | -3.84  | -2.96 | 7.33  | 2.19  | 16.58 | -3.05 | Tra            | YES       | Tra                                   | YES       |
| Tra            | 7.89  | -2.19  | -1.78 | 6.88  | 1.94  | 16.11 | -2.60 | Tra            | YES       | Tra                                   | YES       |
| Tra            | 11.46 | -0.30  | -2.03 | 7.23  | 2.13  | 17.68 | -2.30 | Tra            | YES       | Tra                                   | YES       |
| Tra            | 10.25 | -1.55  | -1.51 | 6.87  | 1.92  | 16.51 | -2.82 | Tra            | YES       | Tra                                   | YES       |
| BSA            | -0.57 | -11.48 | -6.07 | 3.93  | 0.24  | 5.65  | -4.97 | BSA            | YES       | BSA                                   | YES       |

|     |       |        |       |      |       |      |       |     |     |     |     |
|-----|-------|--------|-------|------|-------|------|-------|-----|-----|-----|-----|
| BSA | -3.82 | -11.94 | -6.63 | 3.06 | -0.39 | 4.67 | -5.77 | BSA | YES | BSA | YES |
| BSA | 1.80  | -9.03  | -4.53 | 3.76 | 0.34  | 7.61 | -5.10 | BSA | YES | BSA | YES |
| BSA | -1.62 | -9.48  | -4.76 | 3.13 | -0.12 | 5.86 | -3.50 | BSA | YES | BSA | YES |
| BSA | 1.40  | -7.41  | -4.62 | 3.29 | 0.24  | 7.42 | -4.69 | BSA | YES | BSA | YES |
| BSA | -1.11 | -9.08  | -5.06 | 2.78 | -0.14 | 6.67 | -4.70 | BSA | YES | BSA | YES |
| IgG | -3.47 | -10.77 | -5.05 | 3.54 | -0.28 | 1.79 | -6.41 | IgG | YES | IgG | YES |
| IgG | -4.75 | -12.71 | -5.55 | 3.44 | 0.05  | 1.36 | -6.59 | IgG | YES | IgG | YES |
| IgG | 0.52  | -6.76  | -3.61 | 4.30 | 0.50  | 4.51 | -3.65 | IgG | YES | IgG | YES |
| IgG | -0.65 | -9.02  | -4.01 | 3.96 | 0.79  | 3.84 | -3.75 | IgG | YES | IgG | YES |
| IgG | 2.91  | -4.47  | -2.75 | 4.47 | 0.78  | 5.90 | -3.03 | IgG | YES | IgG | YES |
| IgG | 0.49  | -5.81  | -3.12 | 3.74 | 0.35  | 5.20 | -4.57 | IgG | YES | IgG | YES |

**Table S3.** Dataset matrix for the differences between the fluorescence intensity before and after the addition of different concentrations of Cat in the presence of human serum generated from the multi-fluorescent nGO/ssDNA sensor.

| Analyte       | Ch1   | Ch2   | Ch3   | Ch4  | Ch5   | Ch6   | Ch7   |
|---------------|-------|-------|-------|------|-------|-------|-------|
| 0 µg/mL Cat   | 7.98  | -0.08 | 0.22  | 2.29 | -0.42 | 4.60  | -7.24 |
| 0 µg/mL Cat   | 8.38  | 0.92  | 0.69  | 2.60 | -0.71 | 6.44  | -5.75 |
| 0 µg/mL Cat   | 8.15  | 1.39  | 0.80  | 2.52 | 0.03  | 6.88  | -4.63 |
| 0 µg/mL Cat   | 6.54  | -1.77 | -0.06 | 2.44 | -1.00 | 1.53  | -7.08 |
| 0 µg/mL Cat   | 6.39  | -0.66 | 0.29  | 2.22 | -0.74 | 3.49  | -6.20 |
| 0 µg/mL Cat   | 6.21  | -0.36 | 0.63  | 2.00 | -0.95 | 4.45  | -5.96 |
| 2.5 µg/mL Cat | 11.99 | 2.32  | 1.54  | 5.25 | 1.22  | 9.54  | -5.97 |
| 2.5 µg/mL Cat | 9.04  | 1.64  | 1.11  | 4.59 | 0.56  | 9.42  | -5.80 |
| 2.5 µg/mL Cat | 10.09 | 2.36  | 1.26  | 4.52 | 1.03  | 10.68 | -3.77 |
| 2.5 µg/mL Cat | 9.92  | 1.49  | 1.20  | 5.45 | 1.05  | 7.19  | -5.33 |
| 2.5 µg/mL Cat | 9.48  | 1.38  | 0.82  | 5.09 | 0.39  | 8.42  | -5.93 |
| 2.5 µg/mL Cat | 9.70  | 1.97  | 1.43  | 4.73 | 0.55  | 7.93  | -4.61 |
| 5 µg/mL Cat   | 14.06 | 2.80  | 1.97  | 7.43 | 2.39  | 11.92 | -4.41 |
| 5 µg/mL Cat   | 13.28 | 3.67  | 1.82  | 7.42 | 1.86  | 13.27 | -4.30 |
| 5 µg/mL Cat   | 12.60 | 3.68  | 2.21  | 6.54 | 1.74  | 11.76 | -2.71 |
| 5 µg/mL Cat   | 13.06 | 2.22  | 2.04  | 7.48 | 1.85  | 10.11 | -4.43 |
| 5 µg/mL Cat   | 11.65 | 3.22  | 1.57  | 6.99 | 1.65  | 11.25 | -5.03 |
| 5 µg/mL Cat   | 12.86 | 2.28  | 1.81  | 7.06 | 1.74  | 11.32 | -4.87 |

**Table S4.** Dataset matrix for the differences between the fluorescence intensity before and after the addition of Cat, Myo, and a 1:1 (w/w) mixture of Cat and Myo in the presence of human serum, generated from the multi-fluorescent nGO/ssDNA sensor.

| Analyte                | Ch1   | Ch2  | Ch3  | Ch4  | Ch5  | Ch6    | Ch7    |
|------------------------|-------|------|------|------|------|--------|--------|
| 5 µg/mL Myo            | 13.13 | 2.80 | 1.99 | 6.98 | 2.16 | -18.45 | -9.10  |
| 5 µg/mL Myo            | 13.51 | 4.01 | 1.97 | 6.89 | 1.89 | -6.11  | -6.81  |
| 5 µg/mL Myo            | 12.38 | 3.22 | 2.03 | 6.11 | 1.70 | -5.02  | -6.30  |
| 5 µg/mL Myo            | 13.50 | 2.38 | 2.20 | 8.46 | 2.09 | -36.83 | -12.00 |
| 5 µg/mL Myo            | 12.07 | 2.83 | 1.80 | 7.06 | 1.51 | -29.98 | -10.91 |
| 5 µg/mL Myo            | 12.18 | 2.93 | 2.16 | 6.65 | 1.57 | -27.30 | -9.29  |
| 5 µg/mL Cat            | 15.80 | 5.37 | 2.61 | 8.46 | 2.68 | 12.82  | -2.11  |
| 5 µg/mL Cat            | 15.87 | 5.60 | 2.60 | 9.32 | 2.65 | 15.39  | -4.51  |
| 5 µg/mL Cat            | 17.01 | 5.54 | 2.94 | 8.92 | 3.06 | 14.83  | -2.45  |
| 5 µg/mL Cat            | 15.11 | 2.39 | 2.73 | 9.68 | 3.03 | 12.59  | -4.18  |
| 5 µg/mL Cat            | 14.64 | 4.89 | 2.59 | 9.29 | 2.49 | 14.24  | -4.74  |
| 5 µg/mL Cat            | 13.95 | 3.16 | 2.44 | 8.89 | 2.61 | 12.53  | -4.68  |
| Mixture of Cat and Myo | 15.06 | 3.01 | 2.55 | 8.42 | 2.79 | 13.57  | -3.43  |
| Mixture of Cat and Myo | 14.10 | 4.85 | 2.28 | 7.74 | 2.27 | 14.20  | -4.21  |
| Mixture of Cat and Myo | 13.40 | 3.89 | 2.16 | 7.32 | 2.43 | 14.66  | -2.96  |
| Mixture of Cat and Myo | 13.86 | 2.59 | 1.81 | 7.91 | 2.16 | 11.31  | -4.62  |
| Mixture of Cat and Myo | 12.33 | 3.59 | 1.95 | 7.76 | 2.00 | 12.82  | -5.16  |
| Mixture of Cat and Myo | 13.58 | 2.91 | 2.23 | 7.72 | 2.12 | 12.48  | -2.77  |

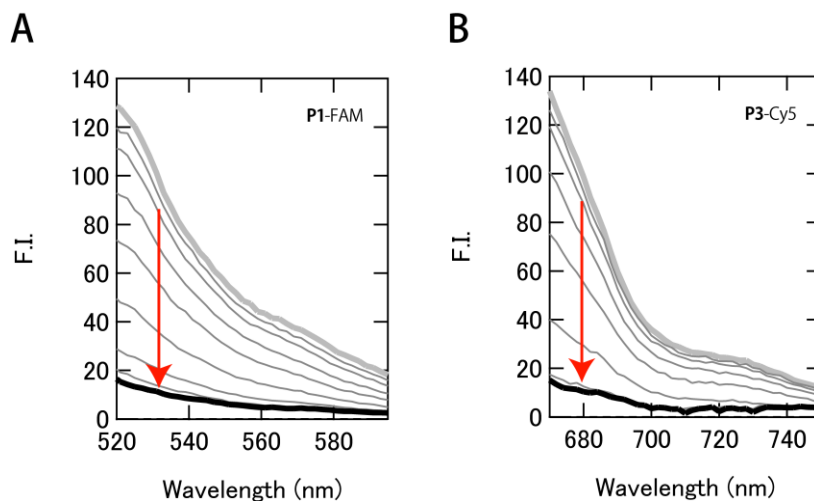

**Figure S1.** Changes in the emission spectra of (A) **P1-FAM** ( $\lambda_{\text{ex}} = 535$  nm) and (B) **P3-Cy5** ( $\lambda_{\text{ex}} = 630$  nm) (20 nM fluorophore-modified ssDNA) in the presence of different concentrations of nGO in PBS (pH = 7.4).

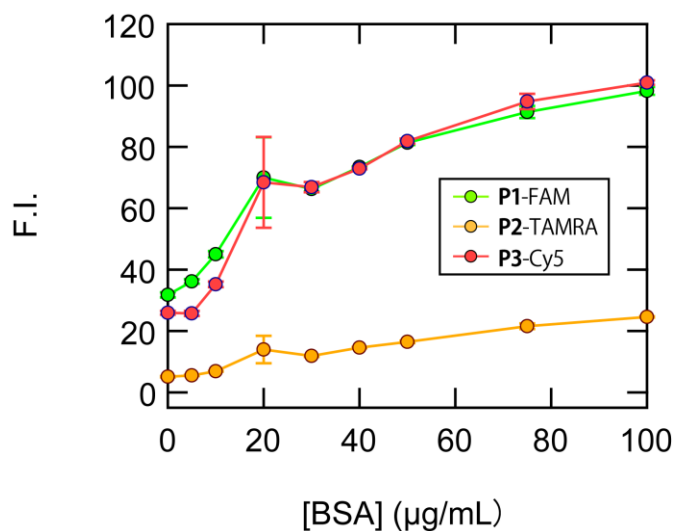

**Figure S2.** Fluorescence recovery of ssDNAs (20 nM) quenched with 100  $\mu\text{g/mL}$  nGO upon addition of various concentrations of BSA in PBS (pH = 7.4); **P1-FAM**:  $\lambda_{\text{ex}} = 480$  nm,  $\lambda_{\text{em}} = 519$  nm; **P2-TAMRA**:  $\lambda_{\text{ex}} = 535$  nm,  $\lambda_{\text{em}} = 579$  nm; **P3-Cy5**:  $\lambda_{\text{ex}} = 630$  nm,  $\lambda_{\text{em}} = 664$  nm.

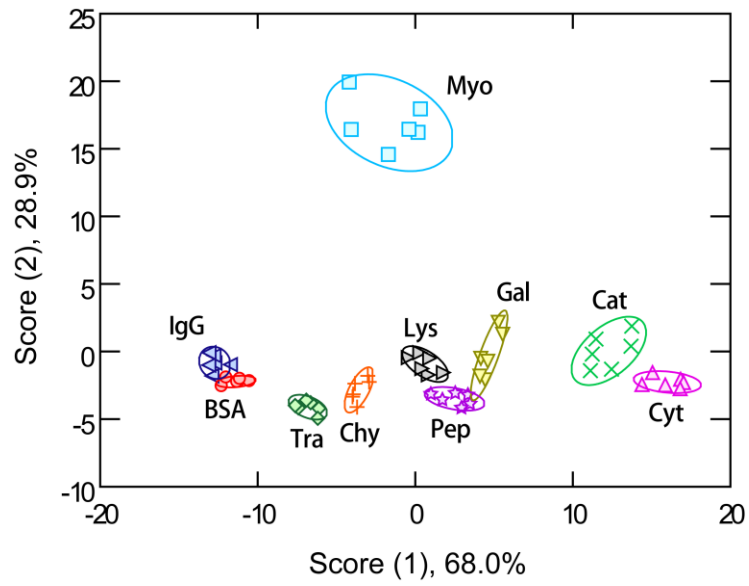

**Figure S3.** Discriminant score plot for 15  $\mu\text{g/mL}$  proteins obtained from the three-channel nGO/ssDNA system (Ch1, Ch4, and Ch6), whereby ellipsoids represent confidence intervals ( $\pm 1$  SD) for the individual analytes.
